# Supplementary material for: Adipose Tissue Mast Cells Promote Human Adipose Beiging in Response to Cold
Source: PubMed Central journal article supplement (PMC6572779; doi:10.1038/s41598-019-45136-9), 2019-06-17
Supplement: 41598_2019_45136_MOESM1_ESM.pdf [file 41598_2019_45136_MOESM1_ESM.pdf]

Scientific Reports

**Supplementary Information**

**Adipose Tissue Mast Cells Promote Human Adipose Beiging in Response to Cold**

Brian S. Finlin, Amy L. Confides, Beibei Zhu, Mary C. Boulanger, Hasiyet Memetimin,  
Kyle W. Taylor, Zachary R. Johnson, Philip M. Westgate, Esther E. Dupont-  
Versteegden, and Philip A. Kern

**Inventory of Supplementary Information**

**Supplementary Figure 1**

**Supplementary Figure 2**

**Supplementary Figure 3**

**Supplementary Table 2**

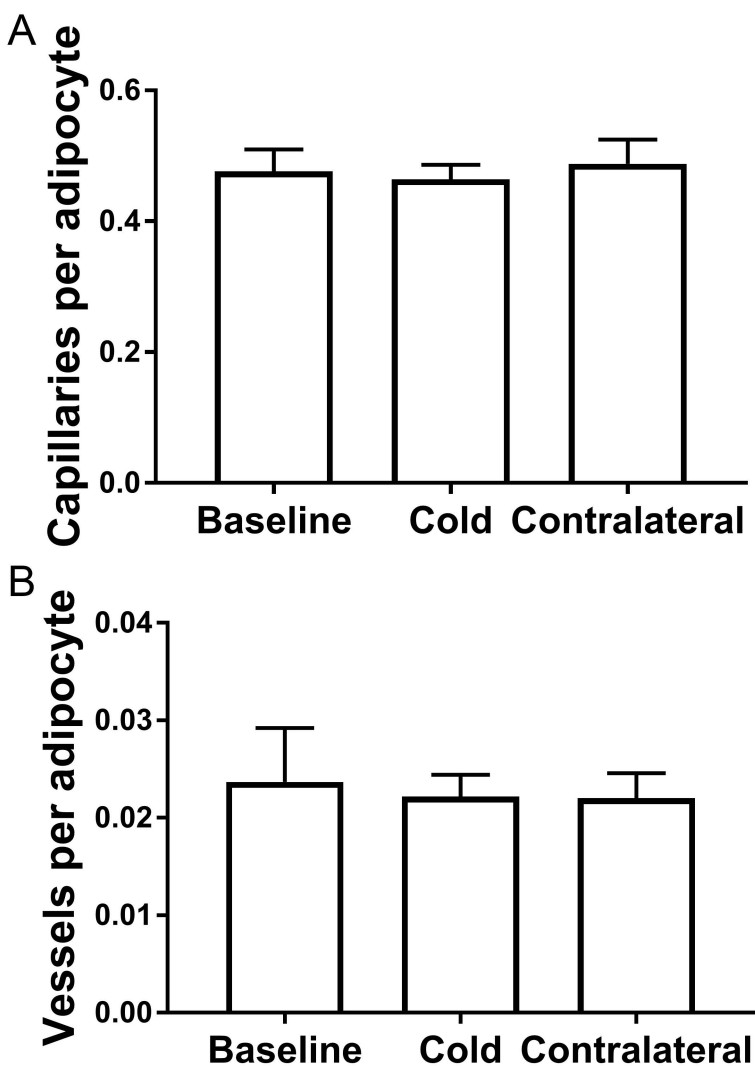

**Figure S1. Capillary and vessel density in SC WAT of lean research participants in response to acute cold treatment.** A) capillaries and B) vessels were quantified in SC WAT as described in methods. Data represent means  $\pm$  SEM (n=6).

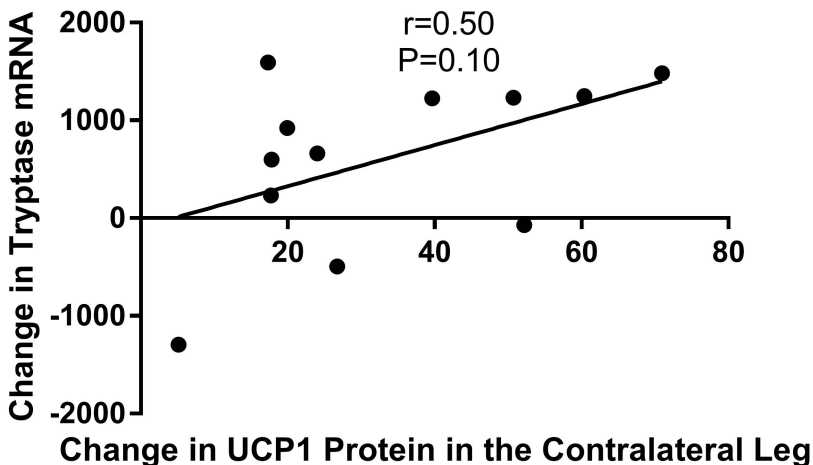

**Figure S2. Correlations of changes in tryptase gene expression with changes in UCP1 in the contralateral leg.** A) the change tryptase versus the change in UCP1 in the contralateral leg is shown. The data were analyzed by linear regression analysis, and Pearson correlation coefficients ( $r$ ) and  $P$  values are shown ( $n=12$ ).

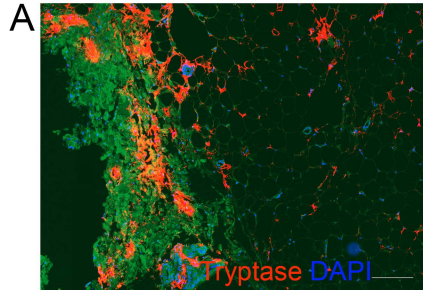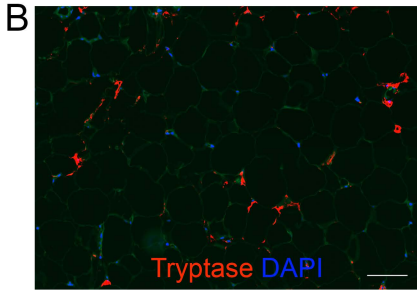

Mast cells in SC WAT Mast cells among adipocytes

**Figure S3. Mast cell staining in human SC WAT.**

A) tryptase staining shows the location of mast cells in fibrotic areas, which are visualized by auto fluorescence in the FITC channel, and in fields of adipocytes (scale bar: 200  $\mu\text{m}$ ).

B) A higher magnification of a shows mast cells among adipocytes (scale bar: 100  $\mu\text{m}$ ).

**Table S2. Primer sequences.**

|         | <b>Forward</b>                 | <b>Reverse</b>                 |
|---------|--------------------------------|--------------------------------|
| mADRB1  | TCC CCC GGA GCT CCC TC         | CTG TCC ACA GTG GTT GTC CC     |
| mADRB2  | GGG AAC GAC AGC GAC TTC TT     | GCC AGG ACG ATA ACC GAC AT     |
| mADRB3  | GAC TAC AGA CCA TAA CCA ACG TG | CCT GGT GGC ATT ACG AGG A      |
| mACTB F | GGC TGT ATT CCC CTC CAT CG     | CCA GTT GGT AAC AAT GCC ATG T  |
| mPPIA F | GAG CTG TTT GCA GAC AAA GTT C  | CCC TGG CAC ATG AAT CCT GG     |
| mPPIB F | GGC TCC GTC GTC TTC CTT TT     | ACT CGT CCT ACA GAT TCA TCT CC |
| mTBP F  | ACC GTG AAT CTT GGC TGT AAA C  | GCA GCA AAT CGC TTG GGA TTA    |
| mTUBB F | AGT AGA GCT CCC AGC AGG C      | TCT CAC CCT CGC CTT CTA AC     |
| mUBC F  | GAC GTC CAA GGT GAT GGT CT     | TCC AGA AAG AGT CCA CCC TG     |
